# Supplementary material for: Neurochemical alterations of different cerebral regions in rats with myocardial ischemia-reperfusion injury based on proton nuclear magnetic spectroscopy analysis
Source: publisher site journal article supplement (doi:10.18632/aging.202250), 2020-12-09
Supplement: Supplementary file [file aging-v13i2-202250-supplementary-material-SD3.pdf]

**Supplementary Table 1. LVEF(%) and LVFS(%) of two groups 2h after MIRI.**

|           | <b>Baseline</b> | <b>MIRI 2h</b>  |
|-----------|-----------------|-----------------|
| LVEF(%)   |                 |                 |
| Con Group | 72.42 ± 3.193   | 69.94 ± 2.478   |
| IR Group  | 75.49 ± 1.512   | 65.65 ± 2.478*  |
| LVFS(%)   |                 |                 |
| Con Group | 42.15 ± 2.878   | 38.81 ± 2.849   |
| IR Group  | 43.31 ± 1.077   | 34.16 ± 1.353** |

Averaged data ejection fraction (LVEF) and fractional shortening (LVFS) assessed by echocardiography in male SD rats subjected to control or IR injury (30 min ischemia and 2h reperfusion). n = 4 rats per group. Results were expressed as mean ± SEM, \*P < 0.01, \*\*P < 0.001. Student's t-test as compared to Con group basal state.
